# Supplementary material for: Perturbations in the neuroactive ligand-receptor interaction and renin angiotensin system pathways are associated with cancer-related cognitive impairment
Source: Springer Nature journal article supplement (doi:10.1007/s00520-025-09317-9), 2025-03-06
Supplement: MOESM4 [file 520_2025_9317_MOESM4_ESM.pdf]

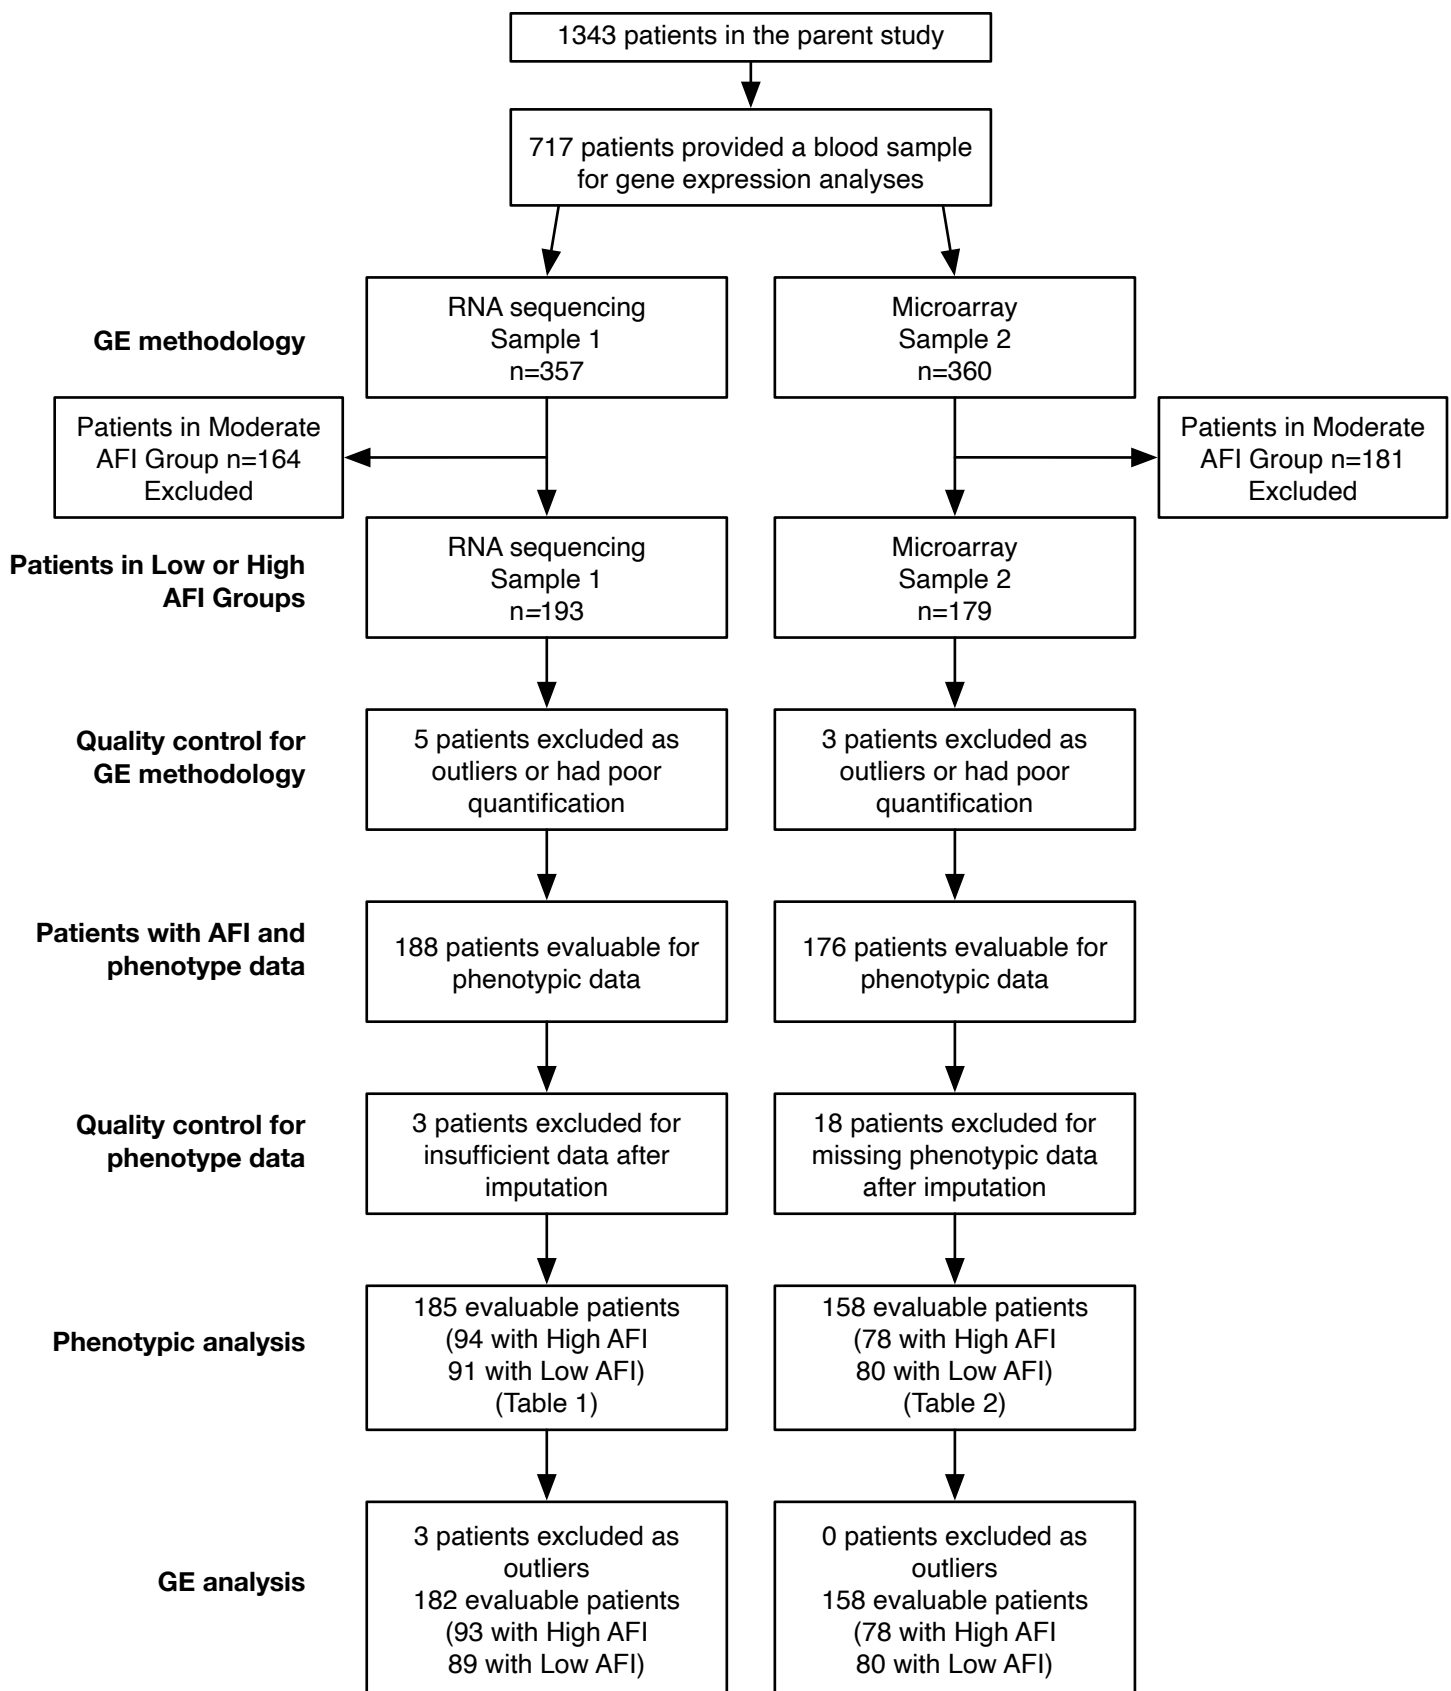

Supplementary Figure 1: Flow diagram of number of patients available for phenotypic and gene expression (GE) analyses for the cancer-related cognitive impairment (CRCI) extreme phenotype analysis. CRCI was assessed using the Attentional Function Index (AFI).
